## Seven Novel *DAX1* Mutations with Loss of Function Identified in Chinese Patients with Congenital Adrenal Hypoplasia

Na Li, Ruya Liu, Huijie Zhang, Jun Yang, Shouyue Sun, Manna Zhang, Yuejun Liu, Yan Lu, Wei Wang, Yiming Mu, Guang Ning, and Xiaoying Li

Shanghai Clinical Center for Endocrine and Metabolic Diseases, Shanghai Institute of Endocrinology and Metabolism (N.L., R.L., H.Z., J.Y., S.S., M.Z., Y.L., G.N., X.L.) and Department of Pediatrics (W.W.), Ruijin Hospital, Shanghai Jiao Tong University School of Medicine, Shanghai 200025, China; The Key Laboratory of Endocrine Tumors and the Division of Endocrine and Metabolic Diseases (G.N., X.L.), E-Institute of Shanghai Universities, Shanghai 200025, China; and Department of Endocrinology (Y.M.), Chinese PLA General Hospital, Beijing 100853, China

**Context:** *DAX1* (for dosage-sensitive sex reversal, adrenal hypoplasia congenital critical region on the X chromosome, gene 1; also called *NROB1*) mutations are responsible for adrenal failure and hypogonadotropic hypogonadism in patients with adrenal hypoplasia congenita (AHC), through a loss of trans-repression of SF-1 (for steroidogenic factor-1)-mediated *StAR* (for steroidogenic acute regulatory protein) and *LHβ* transcriptional activities and a reduction of *GnRH* expression. The correlation of clinical features with genetic and functional alterations of the gene was investigated in detail in AHC patients.

**Objective:** The present study aimed at identifying *DAX1* mutations in Chinese AHC patients and investigating the functional defects of detected novel mutations.

**Patients and Methods:** Nine patients with AHC were recruited from eight families. *DAX1* mutations were screened, and the transcriptional activities of the identified mutations were assessed *in vitro*.

**Results:** *DAX1* mutations were detected in all nine patients enrolled in the study, with eight different mutations. Among the latter, seven are novel mutations, including two missense (L262P and C368F), one nonsense (Q222X), and four frame-shift (637delC, 652\_653delAC, 973delC, and 774\_775insCC) mutations. The functional studies showed that the mutant *DAX1* was impaired by nuclear localization, loss of trans-repression of *StAR* and *LHβ* transcriptional activities, and reduction of *GnRH* expression.

**Conclusion:** These findings provide insight into the molecular events by which *DAX1* mutations influence the hypothalamus-pituitary-gonadal and hypothalamus-pituitary-adrenal axis and lead to AHC and hypogonadotropic hypogonadism. (*J Clin Endocrinol Metab* 95: E104–E111, 2010)

**X**-linked adrenal hypoplasia congenita (AHC) is a rare inherited disorder of adrenal gland development, characterized by absence or near absence of the permanent zone of the adrenal cortex (1). Patients with this condition usually present with primary adrenal failure in infancy or early in childhood, including salt-wasting, hyperpigmen-

tation, hyponatremia, hyperkalemia, reduction of serum glucocorticoid and aldosterone, and increase of plasma ACTH (1). This disease is lethal without appropriate steroid hormone replacement. Hypogonadotropic hypogonadism (HHG), which is usually recognized at the expected time of puberty, is commonly associated with the

ISSN Print 0021-972X ISSN Online 1945-7197  
Printed in U.S.A.

Copyright © 2010 by The Endocrine Society

doi: 10.1210/jc.2009-2408 Received November 11, 2009. Accepted May 18, 2010.

First Published Online June 23, 2010

Abbreviations: AHC, Adrenal hypoplasia congenita; Egr-1, early growth response-1; GFP, green fluorescent protein; HHG, hypogonadotropic hypogonadism; SF-1, steroidogenic factor-1; *StAR*, steroidogenic acute regulatory protein; WT, wild-type.

X-linked AHC. HHG is caused by abnormalities of gonadotropin production in both hypothalamus and pituitary (2) and requires testosterone replacement for sexual maturity (3). Mutations in *DAX1* (for dosage-sensitive sex reversal, adrenal hypoplasia congenital critical region on the X chromosome, gene 1; also called *NROB1*) gene in chromosome Xp21 are responsible for the X-linked AHC/HHG (1, 4).

The *DAX1* gene is composed of two exons separated by a single intron (1, 3) and encodes a 470 amino acid unusual orphan nuclear receptor that is structurally related to the ligand binding domain localized in the carboxyl terminus of other nuclear receptors but lacks the typical zinc finger DNA-binding domain in the amino terminus. Instead, the amino terminus consists of 3.5 alanine/glycine-rich repeats of a 65–70 amino acid motif that is implicated in protein-protein interactions (5) and may bind to hairpin loop structure in DNA (6). *DAX1* expression has been shown in the developing adrenal cortex, gonad, anterior pituitary, and hypothalamus and also in adult adrenal cortex, anterior pituitary gonadotropes, the hypothalamic ventromedial nucleus, Sertoli and Leydig cells in the testis, and theca and granulosa cells in the ovary (7, 8). *DAX1* plays a predominant role as a transcriptional repressor in gonadal and adrenal development and in the regulation of gonadotropin production (9). In particular, there is overwhelming evidence for an interaction of *DAX1* with the nuclear receptor steroidogenic factor-1 (SF-1/NR5A1/Ad4BP) (10–12) and repression of SF-1-mediated transactivation (10). SF-1 belongs to the NR5A subfamily of orphan nuclear receptors and plays critical roles in the regulation of sex determination, adrenal and gonadal developments, reproductive function, and steroidogenesis (11, 13). It seems paradoxical that SF-1 loss-of-function mutations also result in adrenal hypoplasia in mice (11). However, in humans, SF-1 mutations rarely produce adrenal hypoplasia (12). Although it has been reported that *DAX1* can form coactivator complexes that increase the expression of a subset of steroidogenic genes in the adrenal and gonadal cells (14, 15) or interact with SF-1 in upregulating *PBX1* to participate in adrenal development (16), the exact mechanisms remain unclear. *DAX1* has also been proposed to act as a nucleo-cytoplasmic shuttling protein in interaction with ribonucleoprotein structures in the nucleus and polyribosomes in the cytoplasm (17), raising the possibility that it plays an additional regulatory role in posttranscriptional processes.

To date, more than 100 different mutations in *DAX1* have been described, most of which are nonsense or frame-shift mutations that cause premature truncation of the protein. Most of the missense mutations clustered at the carboxyl terminus, and only a few were reported at

the amino terminus (15, 18). In the present study, we identified seven novel *DAX1* mutations in eight patients from seven different families and found altered *DAX1* functions caused by these mutations. Our data may provide insight into the molecular events by which *DAX1* mutations influence the hypothalamus-pituitary-adrenal and hypothalamus-pituitary-gonadal axis and lead to AHC and HHG, respectively.

## Subjects and Methods

### Subjects

Nine patients with AHC and HHG were recruited from the Department of Endocrinology and Metabolism, Rui-Jin Hospital, Shanghai Jiao Tong University School of Medicine and the Beijing Chinese PLA General Hospital during March 2006 to June 2009.

Patients I and II were cousins, and the other seven patients were unrelated. The symptoms and physical findings were ascertained by senior endocrinologists. The clinical characteristics and blood biochemical examinations were shown in Table 1 and Supplemental Table 1 (published on The Endocrine Society's Journals Online web site at <http://jcem.endojournals.org>). Most patients presented with salt-losing and adrenal insufficiency in the early age and lack of development of secondary sexual characteristics at the expected time of puberty.

The patients were also subject to adrenal computed tomography scan and GnRH stimulating tests (Supplemental Table 1). The study protocol was approved by the Institutional Review Board of the Rui-Jin Hospital. The informed consent was obtained from each participant.

### DNA sequence analysis

DNA was extracted from peripheral blood leukocytes using the Puregene kit (Qiagen, Hilden, Germany). Both *DAX1* (NC\_000023, cDNA, NM\_000475) exons and flanking intronic sequence were amplified using the following sets of forward and reverse primers: exon 1 forward, 5' GAGGTCATGGGCGAACAC; exon 1 reverse, 5' TGCTGAGTTAGTCACGATTCT; exon 2 forward, 5' AGCAAAGGACTCTGTGGT; and exon 2 reverse, 5' GAGCTATGCTACCTGTTG.

PCR was performed in a final volume of 50  $\mu$ l reaction system containing 200 ng genomic DNA, 20 pmol of each primer, 200  $\mu$ M dNTPs, 1.5 mM MgCl<sub>2</sub>, and 2.5 U Taq polymerase (Sangon, Shanghai, China). Exon 1 was amplified by an initial denaturation at 95 C for 5 min, followed by 35 cycles of denaturation at 94 C for 30 sec, annealing at 53 C for 30 sec, and elongation at 72 C for 1.5 min, with a final extension at 72 C for 10 min. Exon 2 was amplified by an initial denaturation at 95 C for 5 min, followed by 35 cycles of denaturation at 94 C for 30 sec, annealing at 50 C for 30 sec, and elongation at 72 C for 45 sec, with a final extension step at 72 C for 10 min. Direct DNA sequencing in both directions was performed using an automated sequencer (ABI Prism 3700 DNA Analyzer; Applied Biosystems, Foster City, CA).

### Generation of *DAX1* and SF-1 expression vectors

Full-length *DAX1* cDNA was generated from human pituitary tissues by RT-PCR and inserted into pcDNA3.1/V5-His

**TABLE 1.** Clinical characteristics of AHC patients with DAX1 mutations

| Patient           | Age at presentation/mode of presentation                                             | Age at diagnosis/mode of presentation                                             | ACTH (ng/liter) | Cortisol (μg/liter) | Aldosterone (ng/liter) | PRA (μg/liter · h) | LH (IU/liter) | T (μg/liter) | DAX1 mutations                           |
|-------------------|--------------------------------------------------------------------------------------|-----------------------------------------------------------------------------------|-----------------|---------------------|------------------------|--------------------|---------------|--------------|------------------------------------------|
| I <sup>a</sup>    | 8 yr/vomiting, fatigue, and hyperpigmentation                                        | 18 yr/no development of secondary characteristics                                 | 2500            | 8.1                 | 0.10                   | 32.3               | 0.51          | 0.3          | L262P                                    |
| II <sup>a</sup>   | At birth/hyperpigmentation, repeated vomiting, fever, fatigue, and poor feeding      | 10 yr and 9 months/no development of secondary sexual characteristics             | 220             | 26.2                | 59.60                  | 16.49              | <0.07         | 0.1          | L262P                                    |
| III <sup>b</sup>  | 8 yr/fatigue, anorexia, nausea, vomiting, and progressive hyperpigmentation          | 23 yr/no development of secondary characteristics                                 | 926             | 9.3                 | 65.83                  | UD                 | 0.79          | <0.08        | C368F                                    |
| IV <sup>c</sup>   | At birth/hyperpigmentation, poor feeding, and Apgar score of 0                       | 27 yr/no development of secondary characteristics, fatigue, or mental retardation | 3195            | 97                  | 17.80                  | 3.44               | 0.62          | <0.08        | 637delC; codon 213 (stop codon 263)      |
| V <sup>d</sup>    | At birth/poor feeding, jaundice, progressive hyperpigmentation, and Apgar score of 0 | 6 months/UD                                                                       | 1738            | 26                  | 27.3                   | 6.58               | UD            | 1.35         | 652_653delAC; codon 218 (stop codon 297) |
| VI <sup>e</sup>   | 10 yr/progressive fatigue, and hyperpigmentation                                     | 20 yr/no development of secondary characteristics                                 | 4530            | 46                  | 25.90                  | 11.17              | 0.24          | <0.08        | 973delC; codon 325 (stop codon 371)      |
| VII <sup>f</sup>  | 2 yr/anorexia, fatigue, and hyperpigmentation                                        | 15 yr/poor development of secondary characteristics                               | 11.8            | 17.2                | 21                     | 5.20               | <0.07         | 0.09         | 774_775insCC; codon 259 (stop codon 264) |
| VIII <sup>g</sup> | 5 yr/repeated nausea, vomiting, and abdominal pain                                   | 17 yr/no development of secondary characteristics                                 | 2565.3          | 13.6                | UD                     | UD                 | <0.07         | 0.14         | L278P                                    |
| IX <sup>h</sup>   | 11 yr/dizziness, fatigue, and hyperpigmentation                                      | 26 yr/no development of secondary characteristics                                 | 1195.9          | 68                  | 12.5                   | 2.6                | 0.19          | <0.08        | Q222X                                    |

Normal range, adult: ACTH, 12–78 ng/liter; cortisol, 70–220 μg/liter; aldosterone, 29.4–161.5 ng/liter; PRA, 0.1–5.5 μg/liter · h; LH, 1.3–10.1 IU/liter; T, 1.8–8.4 μg/liter. Normal range, children: LH, 1–18 months, 0.04–3.01 IU/liter; 10–11 yr, 0.03–4.44 IU/liter; 15–18 yr, 0.69–7.15 IU/liter; T, 5–7 months (≤0.59 μg/liter; 10–11 yr, 0.05–0.5 μg/liter; 15–17 yr, 2.2–8 μg/liter. Serum biochemical measurements obtained at diagnosis. PRA, plasma renin activity; T, testosterone; UD, undetermined.

<sup>a</sup> Patients I and II were cousins. Patient I received hydrocortisone when adrenal insufficiency was diagnosed at age of 8 yr until now. Patient II received cortisone acetate when adrenal insufficiency was diagnosed at age of 2 yr and changed to hydrocortisone at age of 5 yr until now.

<sup>b</sup> Patient III received hydrocortisone (10 mg/d) when adrenal insufficiency was diagnosed at age of 8 yr. Hydrocortisone was increased to 20 mg/d at age of 14 yr.

<sup>c</sup> Patient IV received hydrocortisone when adrenal insufficiency (21-hydroxylase deficiency) was diagnosed at birth (dose unclear) and hydrocortisone at 10 mg/d until the age of 27 yr when he presented with loss of salt, including elevated serum potassium (8.1 mm) and low serum sodium (123.0 mm). He has started to receive 9-α-fluorohydrocortisone (100 μg/d) and hydrocortisone (60 mg/d) since then.

<sup>d</sup> Patient V received hydrocortisone (10 mg/d) and fludrocortisone (0.025 mg/d) when adrenal insufficiency (21-hydroxylase deficiency) was diagnosed at birth and hydrocortisone (10 mg/d) and 9-α-fluorohydrocortisone (50 μg/d) until the age of 6 months.

<sup>e</sup> Patient VI did not receive treatment.

<sup>f</sup> Patient VII received hydrocortisone (20 mg/d) when adrenal insufficiency was diagnosed at age of 7 yr and a gradual increase to 40 mg/d until the age of 15 yr.

<sup>g</sup> Patient VIII received cortisone acetate (12.5 mg/d) when adrenal insufficiency was diagnosed at age of 6 yr and cortisone acetate (37.5 mg/d) now.

<sup>h</sup> Patient IX received prednisone (10 mg/d) when adrenal insufficiency was diagnosed at age of 11 yr and an increase to 15 mg because of fatigue at age of 24 yr. An irregular medication was considered because his plasma ACTH was 1195.9 ng/liter when he received 15 mg prednisone. He has started to receive cortisone acetate at 37.5 mg/d since then.

TOPO and pEGFP-C1 expression vectors (Invitrogen, Carlsbad, CA), respectively. The mutants R267P, L262P, C368F, 637delC, and 652\_653delAC were created by site-directed mutagenesis using the KOD-Plus (Toyobo Co. Ltd., Osaka, Japan) for long PCR and DpnI (Stratagene, La Jolla, CA) for digestion. The full-length *SF-1* cDNA was also obtained from human pituitary tissues and inserted into pcDNA3.1/myc-His (–) C (Invitrogen), and the full-length early growth response-1 (*Egr-1*) cDNA was amplified from mouse liver tissues. All the novel amplified cDNAs were confirmed by direct sequencing.

### Cell culture and transient transfection

The human embryonic kidney cell line HEK293T, the mouse adrenal cell line Y1, and the mouse GnRH secreting cell line GT1-7 were used in this study. HEK293T and GT1-7 cells were grown in DMEM (Invitrogen) supplemented with 10% fetal bovine serum (Invitrogen) in a 5% CO<sub>2</sub> atmosphere at 37 C. Y1 cells were grown in F12 medium (Invitrogen) supplemented with 10% fetal bovine serum in a 5% CO<sub>2</sub> atmosphere at 37 C.

HEK293T cells, Y1 cells, and GT1-7 cells were seeded on 24-well plates and transfected using Lipofectamine 2000 Reagent (Invitrogen) according to the instructions of the manufacturer.

### Luciferase assay

StAR luciferase reporter (*StAR-luc*) contains the sequence –965 to +261 bp of the promoter of human steroidogenic acute regulatory protein (*StAR*) gene. *LHβ-luc* contains the sequence –154 to +5 bp (15) of the native rat *LHβ* promoter. GnRH-*luc* contains the sequence –1008 to +17 bp of human *GnRH* promoter, which was not different by luciferase activity from the longer rat promoter (–3026/+116 bp). The sequence –535 to –479 bp of hGnRH promoter is crucial in transcriptional activity *in vivo* and *in vitro* (19).

Y1 cells were cotransfected with 400 ng *StAR-luc*, 20 ng Renilla luciferase reporter pRL-TK (Promega, Madison, WI), and 400 ng wild-type (WT) or mutant *DAX1*. Forskolin (10 μM) (Sigma, St. Louis, MO) or DMSO (10 μM) was added 36 h after transfection, and luciferase assays were performed 12 h after treatment using the Dual Luciferase Reporter Assay System (Promega) according to the instructions of the manufacturer with a luminometer (Turner Biosystems, Sunnyvale, CA). The use of the second plasmid reporter that encodes for Renilla luciferase under the control of thymidine kinase promoter conveniently allows for the normalization of all results according to the transfection efficiency of each individual sample within the same luciferase assay. In addition, *DAX1* repression of *SF-1*-mediated *LHβ* transcriptional activation was examined in HEK293T cells with cotransfection of 200 ng *LHβ-luc*, 20 ng pRL-TK, 200 ng *SF-1*, 400 ng *Egr-1*, and 500 ng WT or mutant *DAX1*. Luciferase assays were performed 24 h after transfection. GT1-7 cells were transfected with 80 ng GnRH-*luc*, 5 ng pRL-SV40, which was also used as an internal control for transfection efficiency, 40 ng *SF-1*, and WT or mutant *DAX1* (10, 20, 40, 80, and 160 ng). Cells were harvested 36 h after transfection, and luciferase activity was then measured.

Total DNA was kept constant by complementing each transfection with empty backbone plasmids whenever it was necessary. The readings were reported as a fold of the empty vector control to allow comparison of the data from different experiments. The results were represented as mean ± SEM from at least

three independent experiments. Each experiment was performed in triplicate transfections.

### Subcellular localization and Western blot

HEK293T cells were seeded on poly-lysine (Sigma)-coated coverslips in 24-well plates and transfected with green fluorescent protein (GFP)-tagged WT or various mutants. At 24 h after transfection, cells were washed three times with PBS and mounted on slides with antifade mountant (Vector Laboratories, Burlingame, CA). The images were captured using an Olympus (Tokyo, Japan) system.

HEK293T cells were seeded in six-well plates and transfected with 4 μg GFP-tagged WT or various mutants. Cytoplasmic and nuclear proteins were extracted, respectively, using a nuclear and cytoplasmic extraction kit (NE-PER Nuclear and Cytoplasmic Extraction Reagents; Pierce, Rockford, IL) at 24 h after transfection according to the instructions of the manufacturer. Equal amounts of proteins (30 μg) were solubilized in sample buffer, loaded onto 10% SDS-PAGE, and transferred to a polyvinylidene difluoride membrane (Millipore Corporation, Billerica, MA) using standard methods. Membranes were probed with specific antibodies that recognize GFP-tagged *DAX1* and various mutants (1:2000, anti-GFP; Sigma), tubulin (1:2000, anti-Tubulin; Cell Signaling Technology, Danvers, MA), and lamin B (1:1000, anti-Lamin B; Santa Cruz Biotechnology, Santa Cruz, CA). After 2 h incubation at room temperature with primary antibodies, the membranes were washed and incubated with appropriate secondary antibodies for 1 h at room temperature. The rabbit secondary antibody for GFP and tubulin (1:2000, Cell Signaling Technology) and the goat for lamin B (1:1000; Santa Cruz Biotechnology) were used. The specific bands were visualized by the ECL system (Amersham ECL plus Western Blotting Detection Reagents; GE Healthcare, Little Chalfont, Buckinghamshire, UK). Tubulin and lamin B were used as cytoplasmic and nuclear loading controls, respectively.

## Results

### Identification of *DAX1* mutations

Direct sequencing was used to characterize *DAX1* mutation in nine patients whose clinical characteristics and blood biochemical examinations were shown in Table 1 and Supplemental Table 1. The results showed that *DAX1* mutations were identified in all the tested patients, including three missense, four frame-shift, and one nonsense mutations (Table 1). L262P mutation was detected in patients I and II from the same family. Two missense mutations (L262P and C368F), one nonsense mutation (Q222X), and four frame-shift mutations (637delC, 652\_653delAC, 973delC, and 774\_775insCC) were not reported previously. The sequencing results were shown in Supplemental Fig. 1.

### Loss of repressor function

*DAX1* has been shown to function primarily as a transcription repressor. Therefore, we investigated whether *DAX1* mutations derived from those patients led to loss of

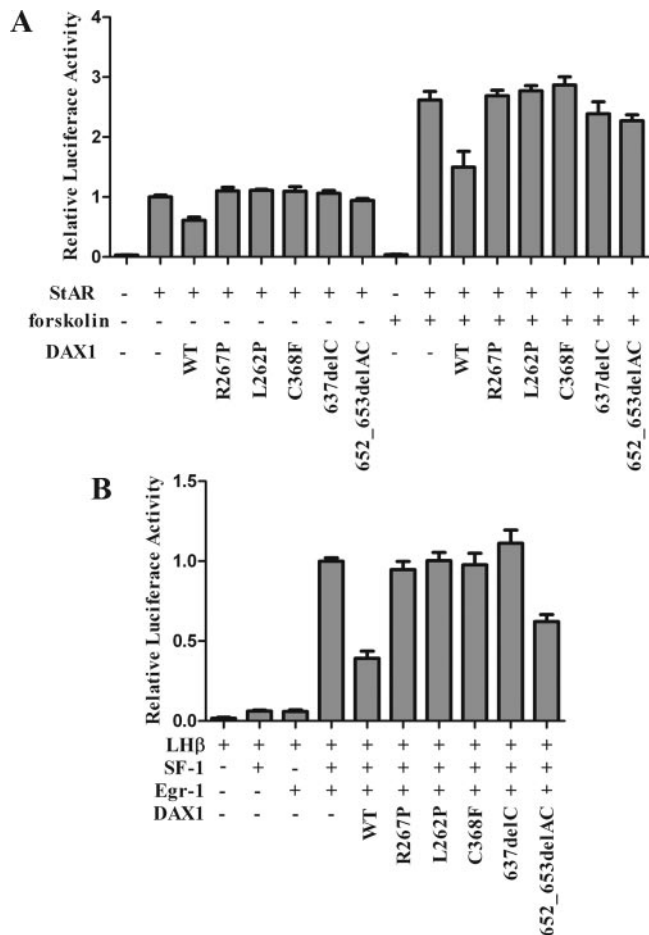

**FIG. 1.** Luciferase assay for *StAR* and *LHB* transcriptional activities. **A**, Mutant DAX1 loss of trans-repression for *StAR* transcriptional activity. Y1 cells were cotransfected with human *StAR*-luc (400 ng) and full-length human WT or mutant DAX1 (400 ng) and treated with or without forskolin (10  $\mu$ M). WT DAX1 suppressed *StAR* transcriptional activity, whereas mutant DAX1 dramatically lost this repression with or without forskolin treatment. Mutant 652\_653delAC only showed a partial loss of repression. **B**, Mutant DAX1 loss of repression for SF-1-mediated *LHB* transcriptional activity. HEK293T cells were cotransfected with rat *LHB*-luc (-154 to +5 bp, 200 ng), full-length *SF-1* (200 ng), full-length *Egr-1* (400 ng), and full-length WT or mutant DAX1 (500 ng). The mutant DAX1 completely lost the suppression of *LHB* transcriptional activity. Mutant 652\_653delAC also showed a partial loss of repression. WT DAX1 and a classic AHC mutant, R267P, were used as controls. The total amount of DNA was constant by complementing with empty backbone plasmid if necessary. Results were represented as a percentage of the empty DAX1 vectors and as the mean  $\pm$  SEM from at least three independent experiments.

repressor function. It was reported previously that DAX1 repressed *StAR* expression by binding to a hairpin in the *StAR* promoter (Fig. 1B) (6). We examined, therefore, DAX1-mediated repression on the human *StAR* promoter, which can be induced by cAMP (6), using WT DAX1 and a “classic” AHC mutant, R267P. We transfected steroidogenic Y1 cells with the *StAR* promoter and observed a 2.7-fold increase when induced by forskolin treatment ( $P < 0.0005$ ) (Fig. 1A). WT DAX1 repressed both basal and cAMP-induced promoter activities by 39

and 44%, respectively ( $P < 0.005$ ), whereas the mutated DAX1 totally lost the repression function of both basal and forskolin-induced *StAR* expression.

*LHB* gene promoter, which could be up-regulated by SF-1 and down-regulated by DAX1 via interaction with SF-1, was next adopted to assess the change of repressor function of newly found mutant DAX1. This promoter contains two composite SF-1/Egr-1 binding sites, which allows synergistic activation of *LHB* gene by these transcription factors (20). Overexpression of SF-1 and Egr-1 resulted in a 25-fold increase of *LHB* transcription. WT DAX1 significantly suppressed SF-1-mediated transcription by 63% ( $P < 0.01$ ), whereas the DAX1 mutants R267P, L262P, C368F, and 637delC completely lost the repression function of SF-1-mediated *LHB* transcription.

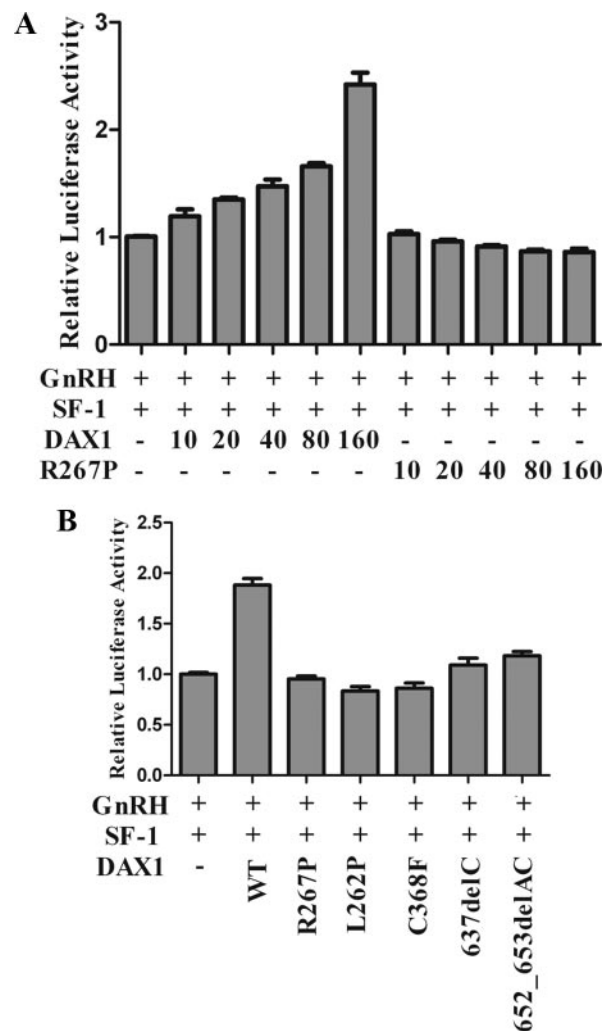

**FIG. 2.** Luciferase assay for GnRH transcriptional activity. GT1-7 cells were transfected with human *GnRH* promoter (-1008 to +17 bp, 80 ng) and full-length SF-1 (40 ng) and full-length WT or mutant DAX1. **A**, A titration of DAX1 plasmid (10, 20, 40, 80, and 160 ng) was used. The pRL-SV40 was used as an internal control for transfection efficiency. **B**, GT1-7 cells were transfected with WT and mutant DAX1 (160 ng) and SF-1 (40 ng). The results are represented as the fold of the empty vector control and as the mean  $\pm$  SEM from at least three independent experiments.

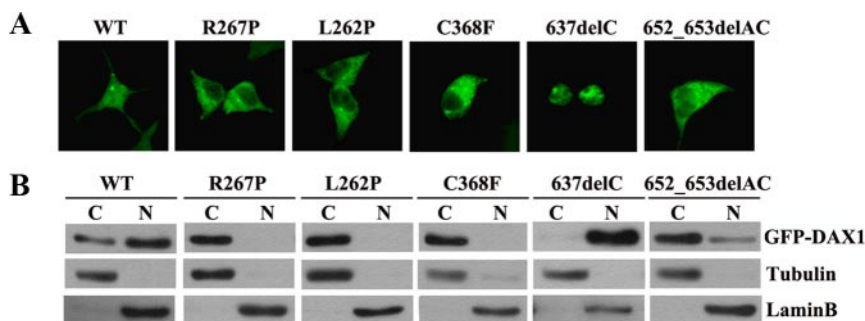

**FIG. 3.** Subcellular localization of mutant DAX1. HEK293T cells were transfected with GFP-tagged WT or mutant DAX1. A, GFP fusion fluorescence. WT DAX1 is predominantly located in the nuclei, whereas DAX1 mutants R267P, L262P, C368F, and 652\_653delAC were exclusively located in cytoplasm. Mutant 637delC was mainly located in the nuclei. B, Western blotting. Cytoplasmic (C) and nuclear (N) proteins were isolated and loaded. Tubulin and lamin B were used as loading controls, respectively.

However, the DAX1 mutant 652\_653delAC showed a partial repression by 38% ( $P < 0.01$ ) (Fig. 1B).

### GnRH expression reduction by DAX1 mutants

To investigate the mechanism of HHG in AHC patients, we further examined GnRH expression by luciferase assay. We transfected GT1-7 cells with the *hGnRH* promoter and WT or mutant DAX1. The results showed that GnRH expression was dramatically increased by WT DAX1 in a dose-dependent manner in the presence of SF-1 but not by DAX1 mutants R267P, L262P, C368F, 637delC, and 652\_653delAC (Fig. 2, A and B).

### Subcellular localization of DAX1 mutants

It was reported that DAX1 mutations led to abnormal nuclear localization and consequently impaired transcriptional repression activity (21–23). DAX1 is exclusively localized in the nuclei in tissues such as the gonads, adrenal cortex, pituitary, ventromedial hypothalamic nucleus (24, 25), and prostate (17). HEK293T cells were transiently transfected with either GFP-tagged WT DAX1 or the mutants R267P, L262P, C368F, 637delC, or 652\_653delAC. GFP fusion fluorescence and Western blots showed that DAX1 was predominantly localized in the nuclei, whereas the mutants R267P, L262P, and C368F were exclusively localized in cytoplasm (Fig. 3, A and B). However, the mutant 637delC was mainly located in the nuclei. Compared with the WT DAX1, the mutant 652\_653delAC showed a major cytoplasmic localization and a slight nuclear localization. The subcellular localization assay was also performed in adrenal Y1, HeLa, and CHO cells, which confirmed the observation seen in HEK293T cells (data not shown).

## Discussion

X-linked AHC is typically caused by the mutation of orphan nuclear receptor gene *DAX1*, which is characterized by pri-

mary adrenal insufficiency associated with HHG. In the present study, we identified seven novel *DAX1* mutations and one previously reported mutation (L278P) (26) in nine AHC patients. Of the seven novel mutations, two are missense (L262P and C368F), one is nonsense (Q222X), and four are frame-shift (637delC, 652\_653delAC, 973delC, and 774\_775insCC) mutations. Three patients with mutations L262P, 637delC, and 652\_653delAC presented with salt-wasting at neonatal, whereas six with mutations L262P, C368F, 973delC, 774\_775insCC, L278P, and Q222X had

their onset at child AHC and HHG. Of note, AHC presenting adrenal insufficiency should be differentiated from 21-hydroxylase deficiency or Addison's disease secondary to multiple etiologies. Distinguishing these disorders is important because they differ in their clinical courses, steroid replacement, prognosis, and genetic counseling. It has been reported that *DAX1* mutations were found in 58% boys (neonatal to 13 yr old) with primary adrenal insufficiency for unknown etiology, in which common causes of adrenal failure such as steroidogenic defects (*e.g.* 21-hydroxylase deficiency) and metabolic disorders (*e.g.* X-linked adrenoleukodystrophy) had been excluded (27). Therefore, it is necessary to detect *DAX1* mutations for definitive diagnosis of the patient presented with salt-wasting states, when common causes of adrenal failure and metabolic disorders had been excluded.

The previous studies as well as ours affirm a phenotypic heterogeneity associated with *DAX1* mutations (15, 18). However, there is a trend for genotype-phenotype correlations to occur within families (28), although the younger brother is usually diagnosed at a younger age as in patients I and II. The absence of genotype-phenotype correlations for certain *DAX1* mutations is presumably caused by the influence of other genes modifying or compensating for *DAX1* function (29, 30). Alternatively, it may also be explained by the need of the entire *DAX1* structure or dispersed protein domains for its normal function. It should also be recognized, however, that all of these transcriptional assays were performed *in vitro* and might not sufficiently reflect the functions of *DAX1 in vivo*. It has been reported that extracellular matrix and hormones can modulate *DAX1* localization in the human fetal adrenal gland (31) and consequently affect the function of *DAX1*, which suggests that *DAX1* may have tissue-specific functions.

The *StAR* protein is an indispensable component in regulating steroid hormone biosynthesis. *DAX1* acts as a powerful transcriptional repressor of *StAR* gene expres-

sion (6), leading to a drastic decrease in steroid production. Our results showed that *DAX1* mutations led to loss of repression of *StAR* expression (Fig. 1). Repression of *StAR* expression in the adrenal cortex by *DAX1* may be a prerequisite for proliferation of the definitive zone in the critical postnatal period in humans. It was speculated that, in the presence of a *DAX1* complete inactivation, the genes involved in steroid hormone production were abnormally activated in adrenal-definitive zone cells at an earlier stage. This process would impair their proliferation and further zonation (32). It was also reported that *DAX1* knockdown in mouse embryonic stem cells induced loss of pluripotency and multilineage differentiation (33). As a result, loss of *DAX1* repression of *StAR* expression leads to adrenal hypoplasia and subsequently causes the low levels of serum steroid hormones. Moreover, patients with *DAX1* mutations always presented with low serum LH levels at puberty. We found that SF-1-mediated *LH $\beta$*  transactivation was suppressed by *DAX1* but not by *DAX1* mutants (Fig. 1). Apparently, the change of *LH $\beta$*  expression did not participate in the HHG in AHC patients (Table 1). We further investigated the *DAX1* regulation of GnRH expression in the hypothalamus. GnRH, a key regulator of reproduction, is released from the hypothalamic neurons and triggers the synthesis and release of pituitary LH and FSH, which are responsible for gonadal steroidogenesis and gametogenesis (34). Our results indicated that *DAX1* increased GnRH expression in the presence of SF-1 in a dose-dependent manner, whereas the *DAX1* mutants did not (Fig. 2, A and B). Thus, HHG in AHC patients could be mainly caused by GnRH downregulation attributable to *DAX1* mutations.

To further explore the molecular mechanism of loss of function, *DAX1* subcellular localization was examined. We found that *DAX1* mutants R267P, L262P, and C368F were exclusively located in cytoplasm, whereas the 652\_653delAC mutant showed a small amount of nucleus accumulation, corresponding to the repression ability. The 637delC mutant also exhibited a complete loss of repression ability, although it was still located in nuclei (Fig. 3). Together, there are two possible explanations for this. First, it is possible that protein misfolding caused by R267P, L262P, or C368F mutation may impact the interaction of *DAX1* with other shuttle proteins such as estrogen receptors  $\alpha$  and  $\beta$  besides SF-1 (22, 35), which could also transport *DAX1* into the nucleus (18). In addition, misfolded proteins may expose new molecular surfaces, subsequently interact with cytoplasmic anchoring sites, and remain in the cytoplasm (32). Interestingly, the misfolding of *DAX1* proteins may also explain their reduced interaction with ribonucleoprotein structures in the nucleus and polyribosomes in the cytoplasm (17). Conse-

quently, transcription repression ability is impaired. The second possibility is related to altered C terminus as a result of novel 637delC and 652\_653delAC mutations. Because the two mutations lose the whole C terminus of *DAX1*, it is proposed that the intact C terminus is critical in determining *DAX1* subcellular localization (21) and also acts as a trans-repression domain (36) as well as an interaction domain with the corepressors N-coR (37) and Alien (38). The two altered C terminus may have certain additional functions, including nuclear localization and trans-repression.

In conclusion, seven novel *DAX1* mutations were identified in patients with AHC and HHG and led to loss of repression of SF-1-mediated *StAR* and *LH $\beta$*  expression. Moreover, we found that *DAX1* mutation resulted in a reduction of GnRH expression, which is associated with HHG. The present study provides insight into the molecular events by which *DAX1* mutations influence the hypothalamus-pituitary-gonadal and hypothalamus-pituitary-adrenal axis and lead to AHC and HHG.

## Acknowledgments

We are grateful to Dr. Chang-Xian Zhang (Faculté de Médecine Domaine Rockefeller, Université Lyon 1, Lyon, France) for the critical reading of this manuscript. We thank G. Yan for technical assistance and J. Larry Jameson's laboratory (Division of Endocrinology, Metabolism, and Molecular Medicine, Northwestern University, The Feinberg School of Medicine, Chicago, IL) and Mingyao Liu's laboratory (The Institute of Biomedical Sciences and School of Life Sciences, East China Normal University, Shanghai, China) for the generous gifts of the *Lh $\beta$*  promoter construct and *GnRH* promoter construct, respectively. We are very grateful to the subjects and their families for their cooperation.

Address all correspondence and requests for reprints to: Guang Ning, M.D., Ph.D. and Xiaoying Li, M.D., Ph.D. Shanghai Institute of Endocrinology and Metabolism, 197 Ruijin 2nd Road, Shanghai 200025, China. E-mail: guangning@medmail.com and lixy@sibs.ac.cn.

This work was supported by Shanghai Committee for Science and Technology Grants 09DJ1400402 and 09XD1403400 and National Nature Science Foundation Grants 30725037 and 30971386.

N.L. and R.L. contributed equally to this work.

Disclosure Summary: We declare that we have no conflicts of interests.

## References

1. Zanaria E, Muscatelli F, Bardoni B, Strom TM, Guioli S, Guo W, Lalli E, Moser C, Walker AP, McCabe ER, Meitinger T, Monaco AP, Sassone-Corsi P, Camerino G 1994 An unusual member of the nuclear hormone receptor superfamily responsible for X-linked adrenal hypoplasia congenita. *Nature* 372:635–641

2. Habiby RL, Boepple P, Nachtigall L, Sluss PM, Crowley Jr WF, Jameson JL 1996 Adrenal hypoplasia congenita with hypogonadotropic hypogonadism: evidence that DAX-1 mutations lead to combined hypothalamic and pituitary defects in gonadotropin production. *J Clin Invest* 98:1055–1062
3. Guo W, Mason JS, Stone Jr CG, Morgan SA, Madu SI, Baldini A, Lindsay EA, Biesecker LG, Copeland KC, Horlick MN, Pettigrew AL, Zanaria E, McCabe ER 1995 Diagnosis of X-linked adrenal hypoplasia congenita by mutation analysis of the DAX1 gene. *JAMA* 274:324–330
4. Muscatelli F, Strom TM, Walker AP, Zanaria E, Récan D, Meindl A, Bardoni B, Guioli S, Zehetner G, Rabl W, Schwarz HP, Kaplan JC, Camerino G, Meitinger T, Monaco AP 1994 Mutations in the DAX-1 gene give rise to both X-linked adrenal hypoplasia congenita and hypogonadotropic hypogonadism. *Nature* 372:672–676
5. Iyer AK, McCabe ER 2004 Molecular mechanisms of DAX1 action. *Mol Genet Metab* 83:60–73
6. Zazopoulos E, Lalli E, Stocco DM, Sassone-Corsi P 1997 DNA binding and transcriptional repression by DAX-1 blocks steroidogenesis. *Nature* 390:311–315
7. Guo W, Burris TP, McCabe ER 1995 Expression of DAX-1, the gene responsible for X-linked adrenal hypoplasia congenita and hypogonadotropic hypogonadism, in the hypothalamic-pituitary-adrenal/gonadal axis. *Biochem Mol Med* 56:8–13
8. Swain A, Zanaria E, Hacker A, Lovell-Badge R, Camerino G 1996 Mouse Dax1 expression is consistent with a role in sex determination as well as in adrenal and hypothalamus function. *Nat Genet* 12:404–409
9. Achermann JC, Ito M, Silverman BL, Habiby RL, Pang S, Rosler A, Jameson JL 2001 Missense mutations cluster within the carboxyl-terminal region of DAX-1 and impair transcriptional repression. *J Clin Endocrinol Metab* 86:3171–3175
10. Ito M, Yu R, Jameson JL 1997 DAX-1 inhibits SF-1-mediated transactivation via a carboxy-terminal domain that is deleted in adrenal hypoplasia congenita. *Mol Cell Biol* 17:1476–1483
11. Luo X, Ikeda Y, Parker KL 1994 A cell-specific nuclear receptor is essential for adrenal and gonadal development and sexual differentiation. *Cell* 77:481–490
12. Lin L, Achermann JC 2008 Steroidogenic factor-1 (SF-1, Ad4BP, NR5A1) and disorders of testis development. *Sex Dev* 2:200–209
13. Mangelsdorf DJ, Thummel C, Beato M, Herrlich P, Schütz G, Umesono K, Blumberg B, Kastner P, Mark M, Chambon P, Evans RM 1995 The nuclear receptor superfamily: the second decade. *Cell* 83:835–839
14. Xu B, Yang WH, Gerin I, Hu CD, Hammer GD, Koenig RJ 2009 Dax-1 and steroid receptor RNA activator (SRA) function as transcriptional coactivators for steroidogenic factor 1 in steroidogenesis. *Mol Cell Biol* 29:1719–1734
15. Verrijn Stuart AA, Ozisik G, de Vroede MA, Giltay JC, Sinke RJ, Peterson TJ, Harris RM, Weiss J, Jameson JL 2007 An amino-terminal DAX1 (NR0B1) missense mutation associated with isolated mineralocorticoid deficiency. *J Clin Endocrinol Metab* 92:755–761
16. Ferraz-de-Souza B, Martin F, Mallet D, Hudson-Davies RE, Cogram P, Lin L, Gerrelli D, Beuschlein F, Morel Y, Huebner A, Achermann JC 2009 CBP/p300-interacting transactivator, with Glu/Asp-rich C-terminal domain, 2, and pre-B-cell leukemia transcription factor 1 in human adrenal development and disease. *J Clin Endocrinol Metab* 94:678–683
17. Lalli E, Ohe K, Hindelang C, Sassone-Corsi P 2000 Orphan receptor DAX-1 is a shuttling RNA binding protein associated with polyribosomes via mRNA. *Mol Cell Biol* 20:4910–4921
18. Bernard P, Ludbrook L, Queipo G, Dinulos MB, Kletter GB, Zhang YH, Phelan JK, McCabe ER, Harley VR, Vilain E 2006 A familial missense mutation in the hinge region of DAX1 associated with late-onset AHC in a prepubertal female. *Mol Genet Metab* 88:272–279
19. Kepa JK, Spaulding AJ, Jacobsen BM, Fang Z, Xiong X, Radovick S, Wierman ME 1996 Structure of the distal human gonadotropin releasing hormone (hGnrh) gene promoter and functional analysis in Gt1–7 neuronal cells. *Nucleic Acids Res* 24:3614–3620
20. Tabarin A, Achermann JC, Recan D, Bex V, Bertagna X, Christin-Maitre S, Ito M, Jameson JL, Bouchard P 2000 A novel mutation in DAX1 causes delayed-onset adrenal insufficiency and incomplete hypogonadotropic hypogonadism. *J Clin Invest* 105:321–328
21. Lehmann SG, Lalli E, Sassone-Corsi P 2002 X-linked adrenal hypoplasia congenita is caused by abnormal nuclear localization of the DAX-1 protein. *Proc Natl Acad Sci USA* 99:8225–8230
22. Kawajiri K, Ikuta T, Suzuki T, Kusaka M, Muramatsu M, Fujieda K, Tachibana M, Morohashi K 2003 Role of the LXXLL-motif and activation function 2 domain in subcellular localization of Dax-1 (dosage-sensitive sex reversal-adrenal hypoplasia congenita critical region on the X chromosome, gene 1). *Mol Endocrinol* 17:994–1004
23. Lehmann SG, Wurtz JM, Renaud JP, Sassone-Corsi P, Lalli E 2003 Structure-function analysis reveals the molecular determinants of the impaired biological function of DAX-1 mutants in AHC patients. *Hum Mol Genet* 12:1063–1072
24. Ikeda Y, Takeda Y, Shikayama T, Mukai T, Hisano S, Morohashi KI 2001 Comparative localization of Dax-1 and Ad4BP/SF-1 during development of the hypothalamic-pituitary-gonadal axis suggests their closely related and distinct functions. *Dev Dyn* 220:363–376
25. Hanley NA, Rainey WE, Wilson DI, Ball SG, Parker KL 2001 Expression profiles of SF-1, DAX1, and CYP17 in the human fetal adrenal gland: potential interactions in gene regulation. *Mol Endocrinol* 15:57–68
26. Bassett JH, O'Halloran DJ, Williams GR, Beardwell CG, Shalet SM, Thakker RV 1999 Novel DAX1 mutations in X-linked adrenal hypoplasia congenita and hypogonadotropic hypogonadism. *Clin Endocrinol (Oxf)* 50:69–75
27. Lin L, Gu WX, Ozisik G, To WS, Owen CJ, Jameson JL, Achermann JC 2006 Analysis of DAX1 (NR0B1) and steroidogenic factor-1 (NR5A1) in children and adults with primary adrenal failure: ten years' experience. *J Clin Endocrinol Metab* 91:3048–3054
28. Achermann JC, Silverman BL, Habiby RL, Jameson JL 2000 Pre-symptomatic diagnosis of X-linked adrenal hypoplasia congenita by analysis of DAX1. *J Pediatr* 137:878–881
29. Scriver CR, Waters PJ 1999 Monogenic traits are not simple: lessons from phenylketonuria. *Trends Genet* 15:267–272
30. Dipple KM, McCabe ER 2000 Phenotypes of patients with "simple" Mendelian disorders are complex traits: thresholds, modifiers, and systems dynamics. *Am J Hum Genet* 66:1729–1735
31. Battista MC, Otis M, Côté M, Laforest A, Peter M, Lalli E, Gallo-Payet N 2005 Extracellular matrix and hormones modulate DAX-1 localization in the human fetal adrenal gland. *J Clin Endocrinol Metab* 90:5426–5431
32. Lalli E, Sassone-Corsi P 2003 DAX-1, an unusual orphan receptor at the crossroads of steroidogenic function and sexual differentiation. *Mol Endocrinol* 17:1445–1453
33. Khalfallah O, Rouleau M, Barbry P, Bardoni B, Lalli E 2009 Dax-1 knockdown in mouse embryonic stem cells induces loss of pluripotency and multilineage differentiation. *Stem Cells* 27:1529–1537
34. Lee VH, Lee LT, Chow BK 2008 Gonadotropin-releasing hormone: regulation of the GnRH gene. *FEBS J* 275:5458–5478
35. Suzuki T, Kasahara M, Yoshioka H, Morohashi K, Umesono K 2003 LXXLL-related motifs in Dax-1 have target specificity for the orphan nuclear receptors Ad4BP/SF-1 and LRH-1. *Mol Cell Biol* 23:238–249
36. Lalli E, Bardoni B, Zazopoulos E, Wurtz JM, Strom TM, Moras D, Sassone-Corsi P 1997 A transcriptional silencing domain in DAX-1 whose mutation causes adrenal hypoplasia congenita. *Mol Endocrinol* 11:1950–1960
37. Crawford PA, Dorn C, Sadovsky Y, Milbrandt J 1998 Nuclear receptor DAX-1 recruits nuclear receptor corepressor N-CoR to steroidogenic factor 1. *Mol Cell Biol* 18:2949–2956
38. Altincicek B, Tenbaum SP, Dressel U, Thormeyer D, Renkawitz R, Baniahmad A 2000 Interaction of the corepressor Alien with DAX-1 is abrogated by mutations of DAX-1 involved in adrenal hypoplasia congenita. *J Biol Chem* 275:7662–7667
